# Supplementary material for: A Fluorescent Biosensor for Streptavidin Detection Based on Double-Hairpin DNA-Templated Copper Nanoparticles
Source: MDPI journal article supplement (doi:10.3390/bios13020168), 2023-01-20
Supplement: s1 [file s1]

## Supporting Material

# A Fluorescent Biosensor for Protein Detection Based on Double-Hairpin DNA-Templated Copper Nanoparticles

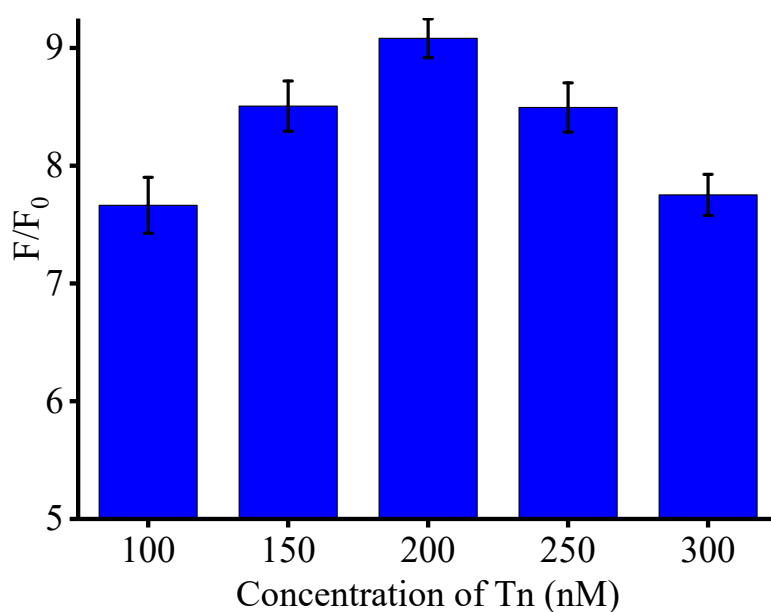

**Figure S1** Optimization of the concentration of Tn (100, 150, 200, 250, 300 nM). The increments of fluorescence intensity measured at different concentrations of the Tn were expressed as  $F/F_0$  ratios, where  $F$  and  $F_0$  represent the fluorescence intensities detected in the presence and absence of SA, respectively. Error bars were estimated from three replicate measurements.

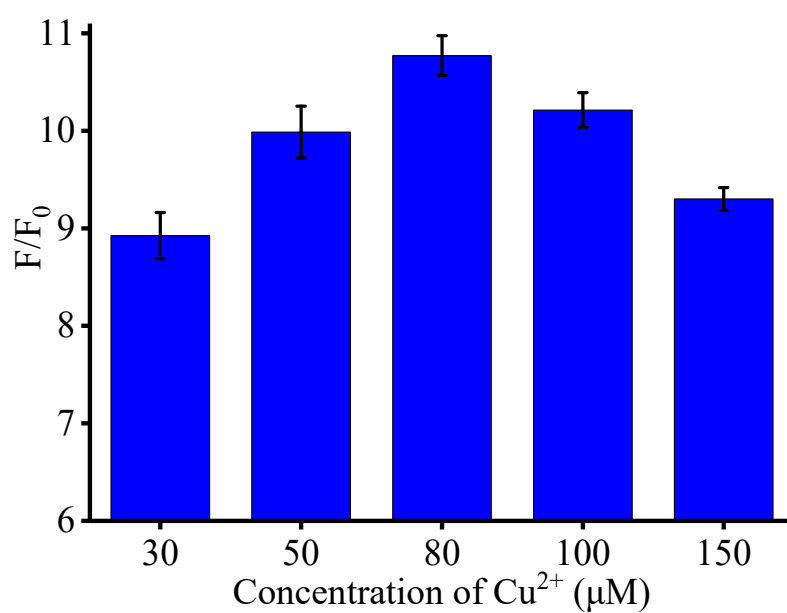

**Figure S2** Optimization of the concentration of  $\text{Cu}^{2+}$  (30, 50, 80, 100, 150  $\mu\text{M}$ ). The increments of fluorescence intensity measured at different concentrations of  $\text{Cu}^{2+}$  were expressed as  $F/F_0$  ratios, where  $F$  and  $F_0$  represent the fluorescence intensities detected in the presence and absence of SA, respectively. Error bars were estimated from three replicate measurements.

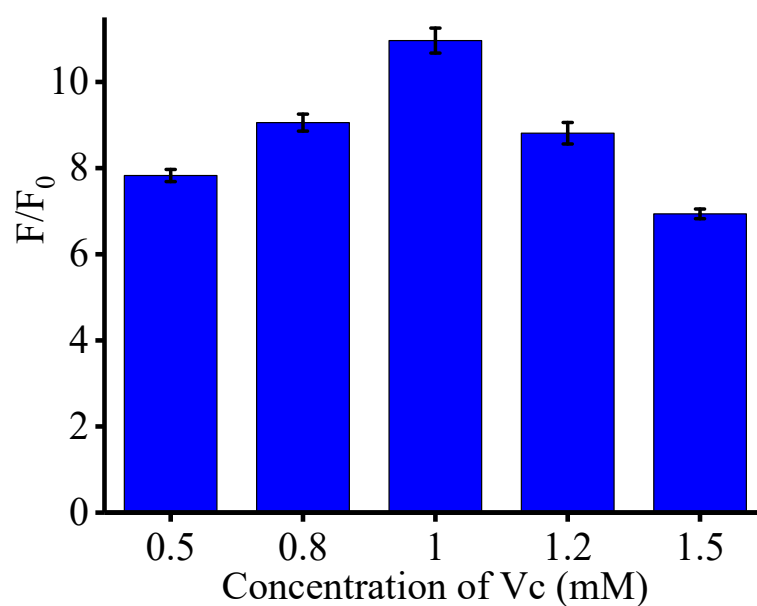

**Figure S3** Optimization of the concentration of Vc (0.5, 0.8, 1, 1.2, 1.5 mM). The increments of fluorescence intensity measured at different concentrations of Vc were expressed as  $F/F_0$  ratios, where  $F$  and  $F_0$  represent the fluorescence intensities detected in the presence and absence of SA, respectively. Error bars were estimated from three replicate measurements.

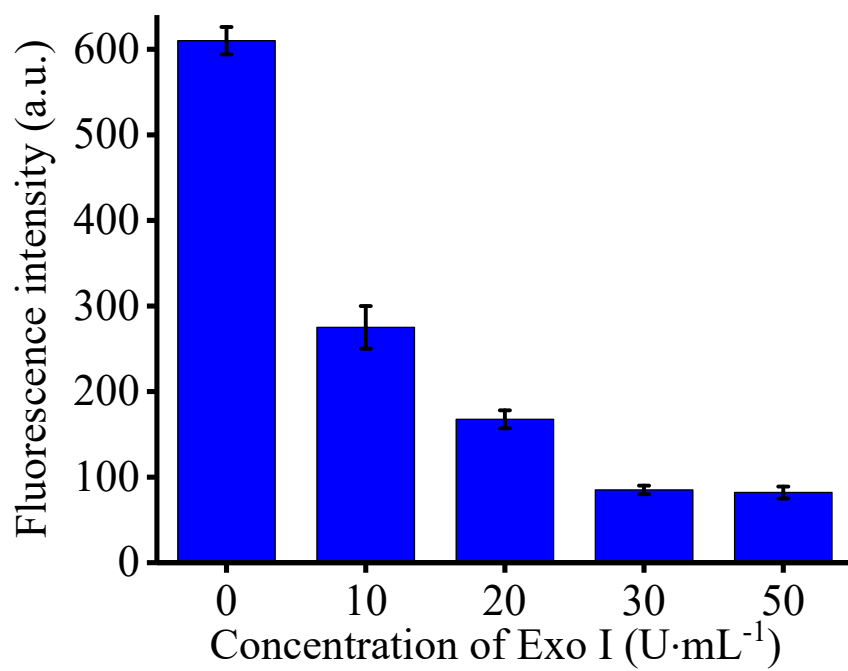

**Figure S4** Optimization of the concentration of Exo I (0, 10, 20, 30, 50 U·mL<sup>-1</sup>).

Error bars were estimated from three replicate measurements.

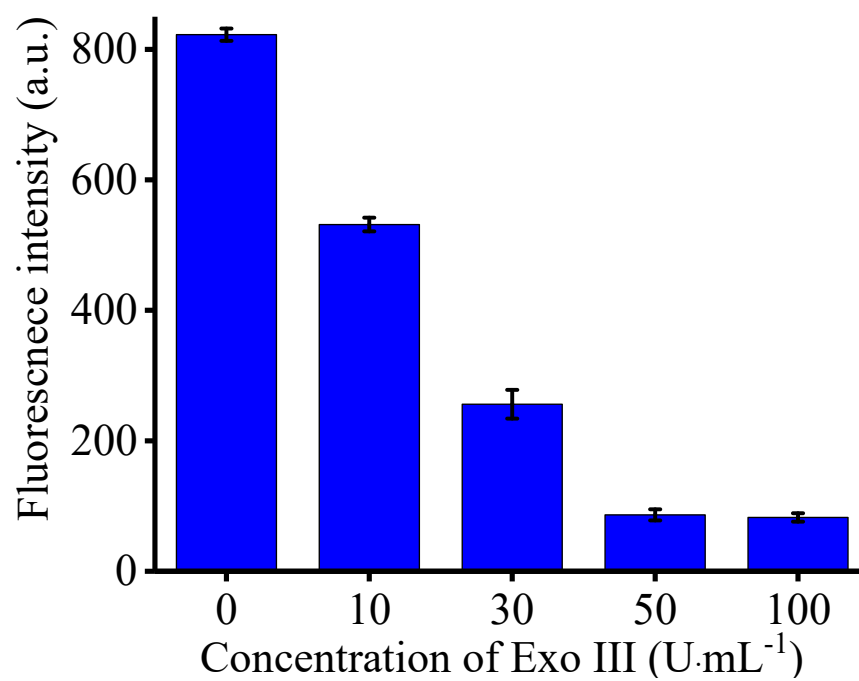

**Figure S5** Optimization of the concentration of Exo III (0, 10, 30, 50, 100 U·mL<sup>-1</sup>).

Error bars were estimated from three replicate measurements.

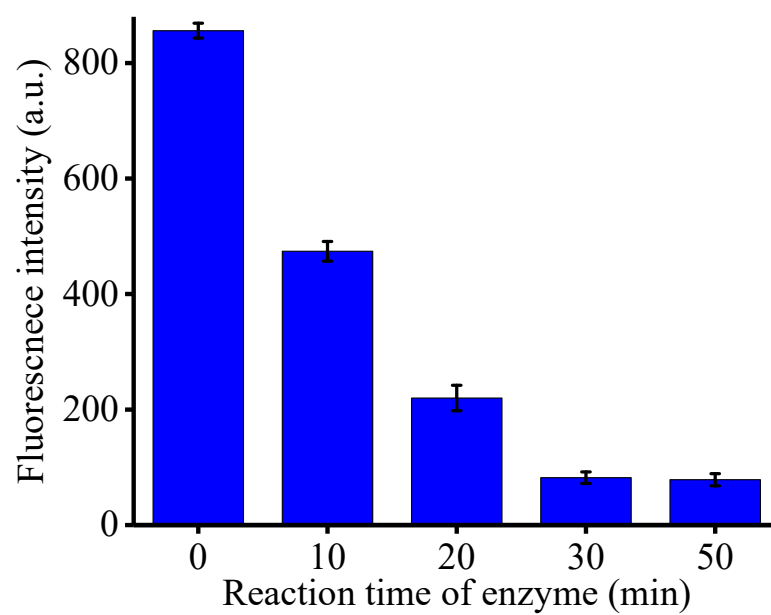

**Figure S6** Optimization of the reaction time of enzyme (0, 10, 20, 30, 50 min). Error bars were estimated from three replicate measurements.

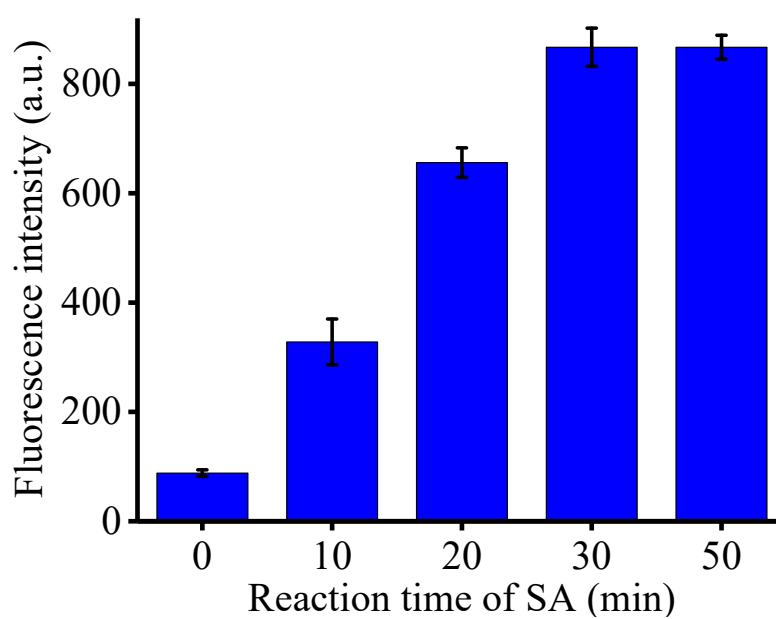

**Figure S7** Optimization of the reaction time of SA (0, 10, 20, 30, 50 min). Error bars were estimated from three replicate measurements.
